# Supplementary material for: The Effect of Fat Distribution on the Inflammatory Response of Multiple Trauma Patients—A Retrospective Study
Source: MDPI journal article supplement (doi:10.3390/life11111243), 2021-11-16
Supplement: s1 [file s1]

Article

# The Effect of Fat Distribution on the Inflammatory Response of Multiple Trauma Patients—A Retrospective Study

Zhaoxiong Chen <sup>1</sup>, Silvan Wittenberg <sup>1</sup>, Timo Alexander Auer <sup>2</sup>, Maxim Bashkuev <sup>3</sup>, Pimrapat Gebert <sup>4</sup>, Uli Fehrenbach <sup>5</sup>, Dominik Geisel <sup>5</sup>, Frank Graef <sup>1</sup>, Sven Maerdian <sup>1\*</sup> and Serafeim Tsitsilonis <sup>1\*</sup>

1. Center for Musculoskeletal Surgery, Corporate Member of Freie Universität Berlin, Humboldt-Universität zu Berlin, Berlin Institute of Health, Charité - Universitätsmedizin Berlin, 10115 Berlin, Germany; zhaoxiong.chen@charite.de (Z.C.); silvan.wittenberg@charite.de (S.W.); frank.graef@charite.de (F.G.)
  2. Clinic for Radiology, Corporate Member of Freie Universität Berlin, Humboldt-Universität zu Berlin, Berlin Institute of Health, Charité - Universitätsmedizin Berlin, 10115 Berlin, Germany; timo-alexander.auer@charite.de
  3. Julius Wolff Institute for Biomechanics and Musculoskeletal Regeneration, Charité - Universitätsmedizin Berlin 10115 Berlin, Germany; maxim.bashkuev@charite.de
  4. Institute of Biometry and Clinical Epidemiology, Charité - Universitätsmedizin Berlin, 10115 Berlin, Germany; pimrapat.gebert@charite.de
  5. Clinic for Radiology, Corporate Member of Freie Universität Berlin, Humboldt-Universität zu Berlin, Charité - Universitätsmedizin Berlin, 10115 Berlin, Germany; uli.fehrenbach@charite.de (U.F.); dominik.geisel@charite.de (D.G.);
- \* Correspondence: sven.maerdian@charite.de (S.M.); serafeim.tsitsilonis@charite.de (S.T.)

Citation: Chen, Z.; Wittenberg, S.; Auer, T.A.; Bashkuev, M.; Gebert, P.; Fehrenbach, U.; Geisel, D.; Graef, F.; Maerdian, S.; Tsitsilonis, S. The Effect of Fat Distribution on the Inflammatory Response of Multiple Trauma Patients—A Retrospective Study. *Life* **2021**, *11*, 1243. <https://doi.org/10.3390/life11111243>

Academic Editors: Claudia Neunaber, Milena Fini and Paolo Cinelli

Received: 14 October 2021 Accepted: 12 November 2021 Published: 16 November 2021

**Publisher's Note:** MDPI stays neutral with regard to jurisdictional claims in published maps and institutional affiliations.

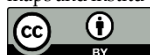

Copyright: © 2021 by the authors. Licensee MDPI, Basel, Switzerland. This article is an open access article distributed under the terms and conditions of the Creative Commons Attribution (CC BY) license (<http://creativecommons.org/licenses/by/4.0/>).

**Table S1.** Estimated correlations between VSr and the SIRS scores after adjustment confounding factors.

|                   | Unstandardized Coefficient (95%CI) |                                   | p-value |
|-------------------|------------------------------------|-----------------------------------|---------|
|                   | $\beta_{\text{crude}}$ (95%CI)     | $\beta_{\text{adjusted}}$ (95%CI) |         |
| <b>Time (Day)</b> | 0.003 (-0.002, 0.008)              | 0.001 (-0.004, 0.006)             | 0.747   |
| Male              | -0.13 (-0.23, -0.04)               | -0.05 (-0.17, 0.06)               | 0.350   |
| VSr               |                                    |                                   |         |
| <0.4              | 0.25 (0.15, 0.35)                  | 0.19 (0.07, 0.30)                 | 0.002   |
| 0.4-0.8           | 0.04 (-0.06, 0.13)                 | -0.09 (-0.20, 0.02)               | 0.108   |
| >0.8              | Reference                          | Reference                         |         |
| BMI               | -0.008 (-0.02, 0.002)              | 0.003 (-0.008, 0.014)             | 0.575   |
| ISS               | 0.01 (0.007, 0.013)                | 0.007 (0.003, 0.010)              | <0.001  |

**Table S2.** Linear regression analysis of VAT, SAT, VSr and BMI

|     | VAT                     | SAT                     | Vsr                     |
|-----|-------------------------|-------------------------|-------------------------|
| BMI | $r^2=0.311$ , $p<0.001$ | $r^2=0.362$ , $p<0.001$ | $r^2=0.003$ , $p=0.553$ |
